# Supplementary material for: PNJ scaffolds promote microenvironmental regulation of glioblastoma stem-like cell enrichment and radioresistance
Source: Royal Society of Chemistry journal article supplement (doi:10.1039/d0bm01169j), 2021-12-21
Supplement: d0bm01169j1.pdf [file d0bm01169j1.pdf]

## Supporting Information

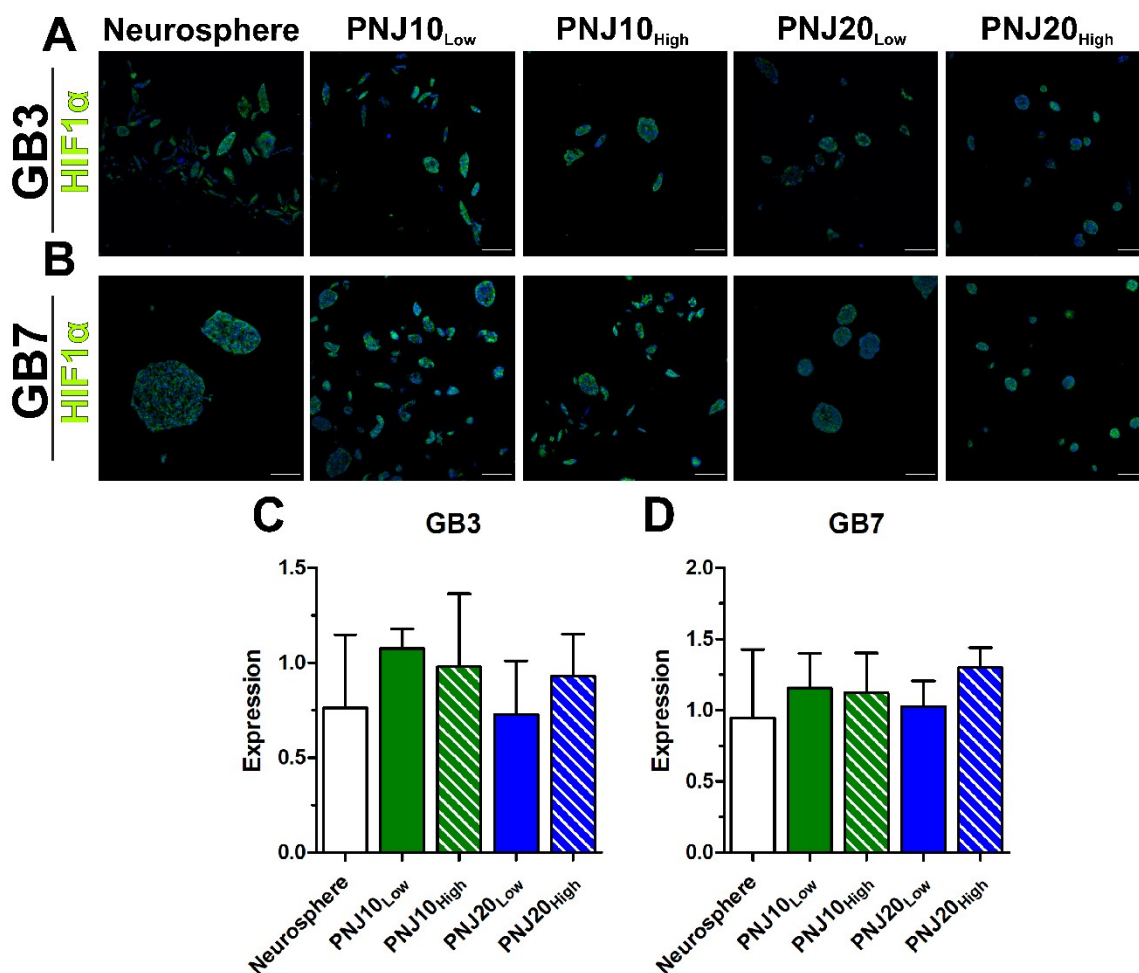

**Supplemental Figure 1.** (A) HIF1 $\alpha$  (green) expression in GB3 and GB7 cells in neurosphere and PNJ scaffold cultures. (B, C) Quantification of immunofluorescence staining was used for direct comparison of expression.

**Supplemental Table 1:** List of primary and secondary antibodies used in this study.

| Primary | Company | Product # | Host | Dilution |
|---------|---------|-----------|------|----------|
|---------|---------|-----------|------|----------|

**Antibodies**

|               |                      |            |        |       |
|---------------|----------------------|------------|--------|-------|
| NESTIN        | Novus<br>Biologicals | NB300-266  | Mouse  | 1:200 |
| HIF2 $\alpha$ | Millipore            | MAB3472    | Mouse  | 1:200 |
| HIF1 $\alpha$ | Abcam                | ab2185     | Rabbit | 1:800 |
| Ki67          | Cell Signaling       | 9449S      | Mouse  | 1:400 |
| $\gamma$ H2AX | Cell Signaling       | 2577S      | Rabbit | 1:400 |
| FAK           | Novus<br>Biologicals | NBP1-47494 | Mouse  | 1:200 |
| pAKT          | Cell Signaling       | 4060S      | Rabbit | 1:25  |
| EGFR          | Abcam                | AB52894    | Rabbit | 1:200 |

**Secondary  
Antibodies**

|                 | <b>Company</b> | <b>Product #</b> | <b>Host / Isotype</b>   | <b>Dilution</b> |
|-----------------|----------------|------------------|-------------------------|-----------------|
| Alexa Fluor 488 | Thermo Fisher  | A21121           | Goat anti-Mouse<br>IgG1 | 1:500           |
| Alexa Fluor 488 | Thermo Fisher  | A21151           | Goat anti-Mouse<br>IgG3 | 1:500           |
| Alexa Fluor 568 | Thermo Fisher  | A11011           | Goat anti-Rabbit<br>IgG | 1:500           |

**Supplemental Table 2:** Cells counted for semi-quantitative analysis of immunofluorescence staining.

| <b>Cells</b> | <b>Marker</b> | <b>Radiation</b> | <b>Culture</b>        | <b>Cells Counted</b> |
|--------------|---------------|------------------|-----------------------|----------------------|
| GB3          | TUNEL         | 2 Gy             | Neurosphere           | 384                  |
|              |               |                  | PNJ10 <sub>Low</sub>  | 470                  |
|              |               |                  | PNJ10 <sub>High</sub> | 364                  |
|              |               |                  | PNJ20 <sub>Low</sub>  | 689                  |
|              |               |                  | PNJ20 <sub>High</sub> | 344                  |
| GB3          | $\gamma$ H2AX | 2 Gy             | Neurosphere           | 865                  |
|              |               |                  | PNJ10 <sub>Low</sub>  | 340                  |
|              |               |                  | PNJ10 <sub>High</sub> | 281                  |

|     |               |      |                       |      |
|-----|---------------|------|-----------------------|------|
|     |               |      | PNJ20 <sub>Low</sub>  | 689  |
|     |               |      | PNJ20 <sub>High</sub> | 344  |
| GB3 | Ki67          | 2 Gy | Neurosphere           | 865  |
|     |               |      | PNJ10 <sub>Low</sub>  | 340  |
|     |               |      | PNJ10 <sub>High</sub> | 281  |
|     |               |      | PNJ20 <sub>Low</sub>  | 689  |
|     |               |      | PNJ20 <sub>High</sub> | 344  |
| GB7 | TUNEL         | 2 Gy | Neurosphere           | 3907 |
|     |               |      | PNJ10 <sub>Low</sub>  | 1399 |
|     |               |      | PNJ10 <sub>High</sub> | 1262 |
|     |               |      | PNJ20 <sub>Low</sub>  | 2535 |
|     |               |      | PNJ20 <sub>High</sub> | 1802 |
| GB7 | $\gamma$ H2AX | 2 Gy | Neurosphere           | 1396 |
|     |               |      | PNJ10 <sub>Low</sub>  | 347  |
|     |               |      | PNJ10 <sub>High</sub> | 274  |
|     |               |      | PNJ20 <sub>Low</sub>  | 166  |
|     |               |      | PNJ20 <sub>High</sub> | 362  |
| GB7 | Ki67          | 2 Gy | Neurosphere           | 1396 |
|     |               |      | PNJ10 <sub>Low</sub>  | 347  |
|     |               |      | PNJ10 <sub>High</sub> | 274  |
|     |               |      | PNJ20 <sub>Low</sub>  | 166  |
|     |               |      | PNJ20 <sub>High</sub> | 362  |
| GB3 | NESTIN        | 0 Gy | Neurosphere           | 1009 |
|     |               |      | PNJ10 <sub>Low</sub>  | 3241 |
|     |               |      | PNJ10 <sub>High</sub> | 907  |
|     |               |      | PNJ20 <sub>Low</sub>  | 898  |
|     |               |      | PNJ20 <sub>High</sub> | 318  |
| GB3 | NESTIN        | 2 Gy | Neurosphere           | 719  |
|     |               |      | PNJ10 <sub>Low</sub>  | 1064 |
|     |               |      | PNJ10 <sub>High</sub> | 499  |
|     |               |      | PNJ20 <sub>Low</sub>  | 843  |
|     |               |      | PNJ20 <sub>High</sub> | 394  |

|     |               |      |                       |      |
|-----|---------------|------|-----------------------|------|
| GB3 | HIF2 $\alpha$ | 0 Gy | Neurosphere           | 673  |
|     |               |      | PNJ10 <sub>Low</sub>  | 338  |
|     |               |      | PNJ10 <sub>High</sub> | 249  |
|     |               |      | PNJ20 <sub>Low</sub>  | 1454 |
|     |               |      | PNJ20 <sub>High</sub> | 394  |
| GB3 | HIF2 $\alpha$ | 2 Gy | Neurosphere           | 696  |
|     |               |      | PNJ10 <sub>Low</sub>  | 531  |
|     |               |      | PNJ10 <sub>High</sub> | 397  |
|     |               |      | PNJ20 <sub>Low</sub>  | 492  |
|     |               |      | PNJ20 <sub>High</sub> | 326  |
| GB7 | NESTIN        | 0 Gy | Neurosphere           | 3777 |
|     |               |      | PNJ10 <sub>Low</sub>  | 1280 |
|     |               |      | PNJ10 <sub>High</sub> | 632  |
|     |               |      | PNJ20 <sub>Low</sub>  | 1560 |
|     |               |      | PNJ20 <sub>High</sub> | 495  |
| GB7 | NESTIN        | 2 Gy | Neurosphere           | 4418 |
|     |               |      | PNJ10 <sub>Low</sub>  | 424  |
|     |               |      | PNJ10 <sub>High</sub> | 454  |
|     |               |      | PNJ20 <sub>Low</sub>  | 713  |
|     |               |      | PNJ20 <sub>High</sub> | 590  |
| GB7 | HIF2 $\alpha$ | 0 Gy | Neurosphere           | 2747 |
|     |               |      | PNJ10 <sub>Low</sub>  | 407  |
|     |               |      | PNJ10 <sub>High</sub> | 1154 |
|     |               |      | PNJ20 <sub>Low</sub>  | 901  |
|     |               |      | PNJ20 <sub>High</sub> | 352  |
| GB7 | HIF2 $\alpha$ | 2 Gy | Neurosphere           | 2062 |
|     |               |      | PNJ10 <sub>Low</sub>  | 1190 |
|     |               |      | PNJ10 <sub>High</sub> | 751  |
|     |               |      | PNJ20 <sub>Low</sub>  | 603  |
|     |               |      | PNJ20 <sub>High</sub> | 540  |
| GB3 | HIF1 $\alpha$ | 0 Gy | Neurosphere           | 975  |
|     |               |      | PNJ10 <sub>Low</sub>  | 662  |

|     |               |      |                       |      |
|-----|---------------|------|-----------------------|------|
| GB7 | HIF1 $\alpha$ | 0 Gy | PNJ10 <sub>High</sub> | 588  |
|     |               |      | PNJ20 <sub>Low</sub>  | 623  |
|     |               |      | PNJ20 <sub>High</sub> | 674  |
|     |               |      | Neurosphere           | 2928 |
|     |               |      | PNJ10 <sub>Low</sub>  | 1140 |
|     |               |      | PNJ10 <sub>High</sub> | 578  |
|     |               |      | PNJ20 <sub>Low</sub>  | 903  |
|     |               |      | PNJ20 <sub>High</sub> | 346  |
